# Supplementary material for: Combined Effect of Cold Atmospheric Plasma and Curcumin in Melanoma Cancer
Source: Hindawi journal article supplement (doi:10.1155/2021/1969863), 2021-01-01
Supplement: f1 [file 1969863.f1.pdf]

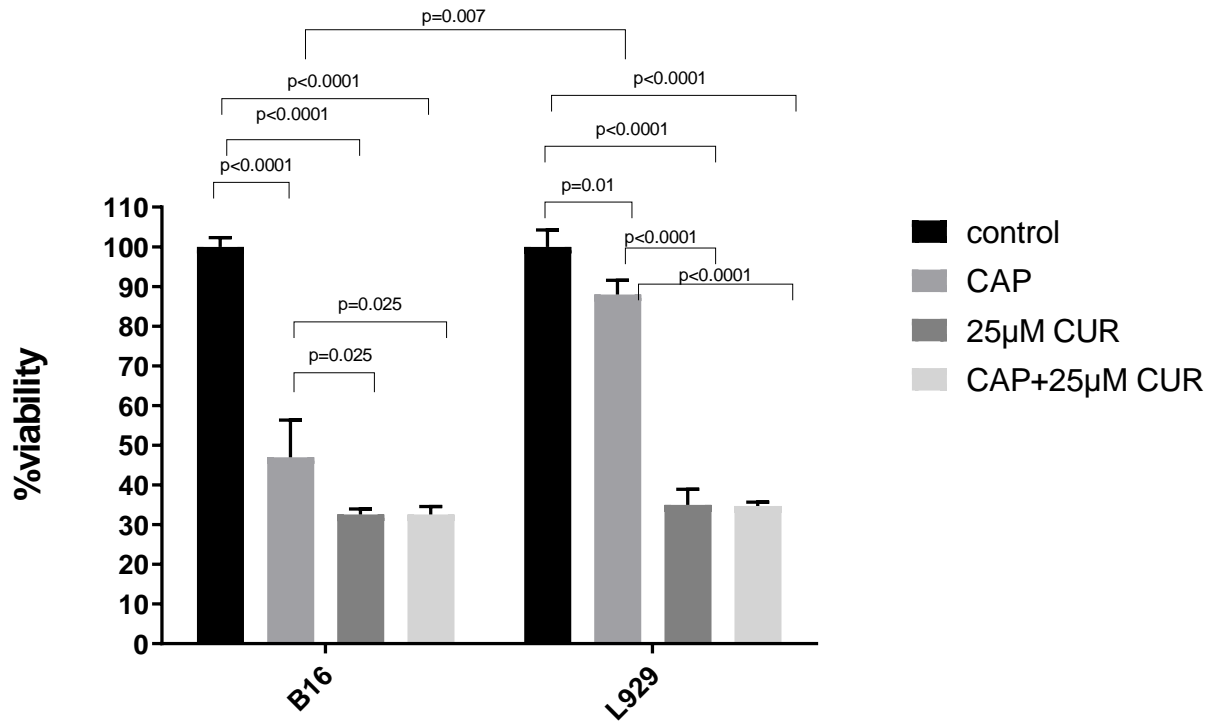

Supplementary Fig.1 Cytotoxic effect of combination therapy with CAP and 25 micro molar of CUR on B16-F10 melanoma cancer and L929 normal cell lines.

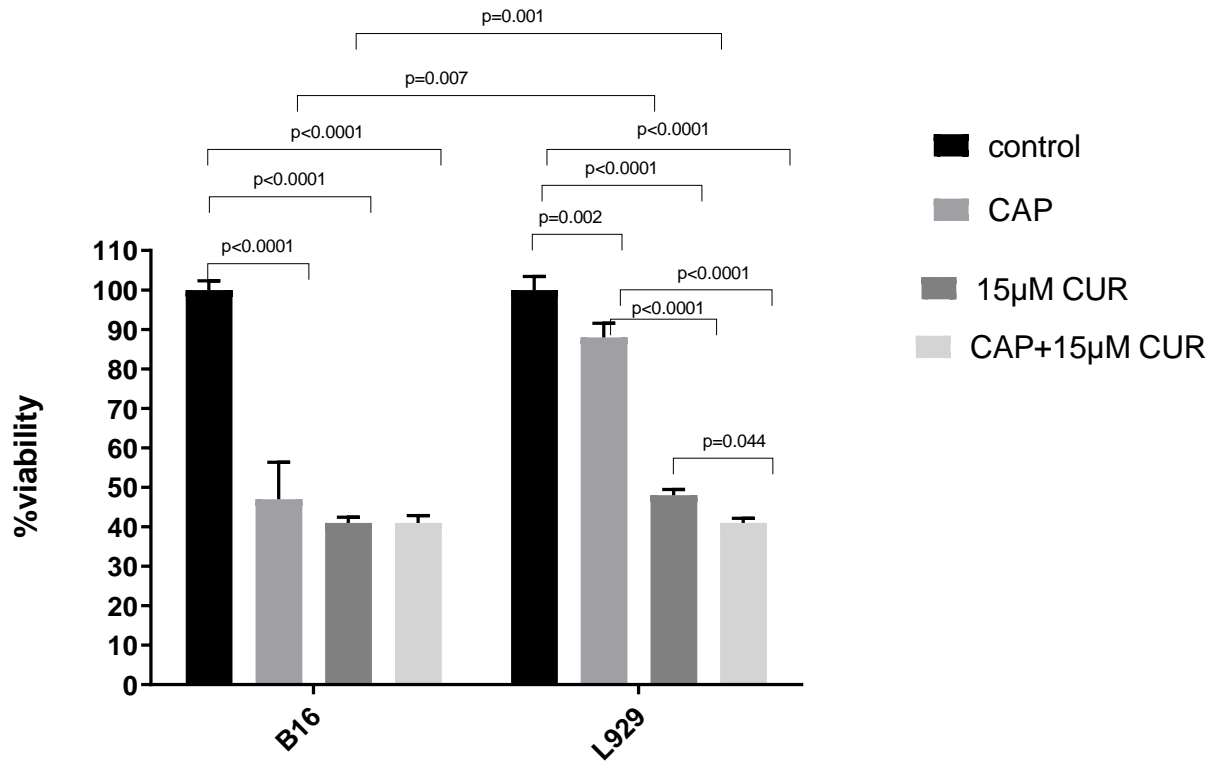

Supplementary Fig.2 Cytotoxic effect of combination therapy with CAP and 15 micro molar of CUR on B16-F10 melanoma cancer and L929 normal cell lines.
